# Supplementary material for: Cellulite Reduction by Modified Thai Herbal Compresses; A Randomized Double-Blind Trial
Source: PubMed Central journal article supplement — J Evid Based Integr Med. 2018 Aug 29;23:2515690X18794158. doi: 10.1177/2515690X18794158 (PMC6116069; doi:10.1177/2515690x18794158), 2018-08-29
Supplement: Supplementary_File_794158.pdf [file Supplementary_File_794158.pdf]

## Supplementary material

**Table S1.** Effect sizes for all measured parameters calculated by comparing herbal with placebo compress action at each time point using Cohen's d statistic.

| Parameter measured         | Time point compared, week | Effect size (95% CI) | Parameter measured        | Time point compared, week | Effect size (95% CI) |
|----------------------------|---------------------------|----------------------|---------------------------|---------------------------|----------------------|
| Cellulite score            | Week 3                    | 0.57 (-0.0, 1.2)     |                           |                           |                      |
|                            | Week 5                    | 0.98 (0.3, 1.6)      |                           |                           |                      |
|                            | Week 7                    | 0.89 (0.2, 1.5)      |                           |                           |                      |
|                            | Week 9                    | 1.16 (0.9, 1.8)      |                           |                           |                      |
|                            | 'Washout'                 | 0.35 (-0.3, 1.0)     |                           |                           |                      |
| Thigh circumference @15cm  | Week 3                    | 1.14 (0.5, 1.8)      | Thigh circumference @25cm | Week 3                    | 0.33 (-0.3, 1.0)     |
|                            | Week 5                    | 1.17 (0.5, 1.9)      |                           | Week 5                    | 0.79 (0.1, 1.4)      |
|                            | Week 7                    | 0.75 (0.1, 1.4)      |                           | Week 7                    | 0.81 (0.2, 1.5)      |
|                            | Week 9                    | 0.96 (0.3, 1.6)      |                           | Week 9                    | 0.55 (-0.2, 1.2)     |
|                            | 'Washout'                 | 0.79 (0.1, 1.4)      |                           | 'Washout'                 | 0.05 (-0.6, 0.7)     |
| Skin fold thickness, front | Week 3                    | 1.23 (0.6, 1.9)      | Skin fold thickness, back | Week 3                    | 1.07 (0.4, 1.7)      |
|                            | Week 5                    | 1.64 (0.9, 2.4)      |                           | Week 5                    | 1.46 (0.8, 2.2)      |
|                            | Week 7                    | 1.31 (0.6, 2.0)      |                           | Week 7                    | 1.55 (0.8, 2.3)      |
|                            | Week 9                    | 1.37 (0.7, 2.1)      |                           | Week 9                    | 1.72 (1.0, 2.5)      |
|                            | 'Washout'                 | 1.18 (0.5, 1.9)      |                           | 'Washout'                 | 1.24 (0.6, 1.9)      |
